# Supplementary material
Source: PubMed Central journal article supplement (PMC5481650)

Figure S1

A

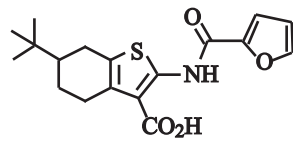

CaCC<sub>inh</sub>-A01

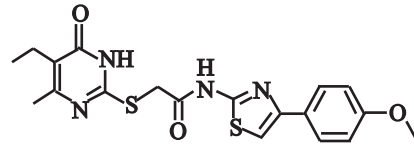

T16A<sub>inh</sub>-A01

B

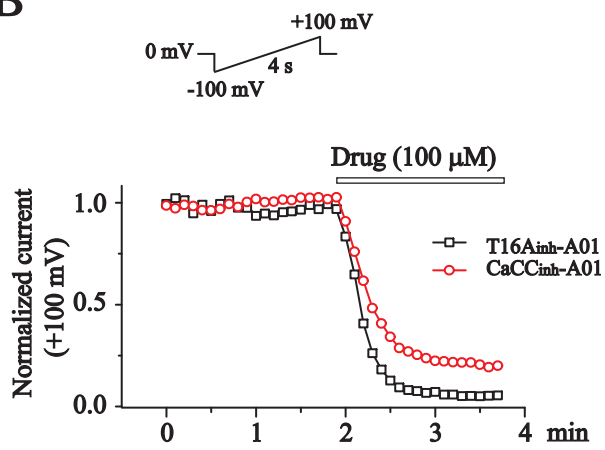

C

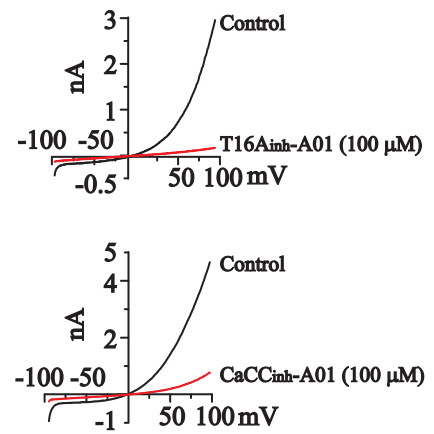

Supplement: BPH-174-2334-s001.pdf [file BPH-174-2334-s001.pdf]

Figure S2

A

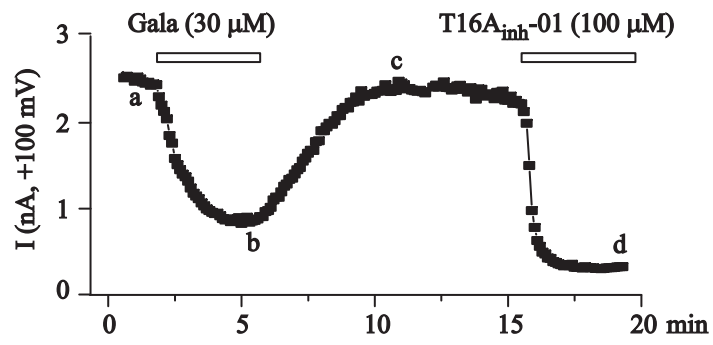

B

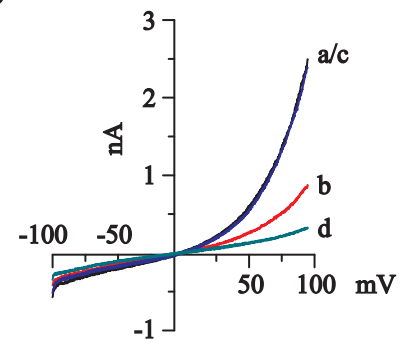

Supplement: BPH-174-2334-s002.pdf [file BPH-174-2334-s002.pdf]

Figure S3

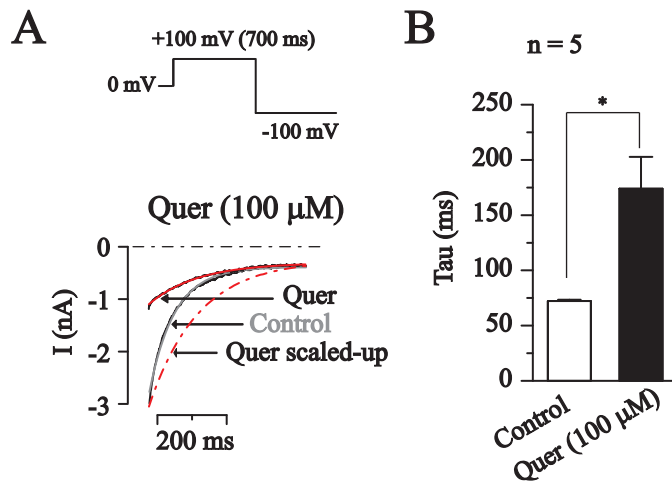

Supplement: BPH-174-2334-s003.pdf [file BPH-174-2334-s003.pdf]
